# Supplementary material for: Tyrosine Kinase Inhibitors Improved Survival of Critically Ill EGFR-Mutant Lung Cancer Patients Undergoing Mechanical Ventilation
Source: MDPI journal article supplement (doi:10.3390/biomedicines9101416), 2021-10-08
Supplement: s1 [file s1]

### Patient characteristics

**Table S1.** Demographic data of EGFR-TKI-treated NSCLC patients who were admitted to the ICU and received mechanical ventilation.

|                                                            | All ( <i>n</i> = 63) |       | EGFR Wild-type ( <i>n</i> = 28) |     | EGFR mutation ( <i>n</i> = 35) |       | <i>p</i> value |
|------------------------------------------------------------|----------------------|-------|---------------------------------|-----|--------------------------------|-------|----------------|
| Gender (Male)                                              | 25                   | 40%   | 13                              | 46% | 12                             | 34%   | 0.328          |
| Age (median, range)                                        | 73 (63–80)           |       | 73 (56–84)                      |     | 73 (67–79)                     |       | 0.793          |
| Smokers ( <i>n</i> , %)                                    | 20                   | 32%   | 12                              | 43% | 8                              | 23%   | 0.248          |
| APACHE II score                                            | 23 (18–27)           |       | 20 (15–25)                      |     | 25 (22–28)                     |       | 0.002          |
| Stage IV ( <i>n</i> , %)                                   | 61                   | 97%   | 27                              | 96% | 34                             | 97%   | 0.872          |
| Interval between cancer diagnosis and ICU admission (days) | 17 (0–376)           |       | 5 (0–45)                        |     | 134 (6–546)                    |       | 0.003          |
| <b>Histology</b>                                           |                      |       |                                 |     |                                |       |                |
| Adenocarcinoma<br>(22 with histological subclassification) | 61                   | 97%   | 27                              | 96% | 34                             | 97%   | 0.872          |
| Acinar                                                     | 10/22                | 45.5% | 4/10                            | 40% | 6/12                           | 50%   | 0.658          |
| Papillary                                                  | 5/22                 | 22.7% | 3/10                            | 30% | 2/12                           | 16.7% | 0.481          |
| Solid                                                      | 3/22                 | 13.6% | 2/10                            | 20% | 1/12                           | 8.3%  | 0.451          |
| Mucinous                                                   | 2/22                 | 9.1%  | 2/10                            | 20% | 0/12                           | 0%    | 0.899          |
| Poorly-differentiated                                      | 2/22                 | 9.1%  | 0/10                            | 0%  | 2/12                           | 16.7% | 0.193          |
| Sarcomatoid carcinoma                                      | 2                    | 3%    | 1                               | 4%  | 1                              | 3%    | 0.872          |
| <b>Comorbidity</b>                                         |                      |       |                                 |     |                                |       |                |
| DM                                                         | 20                   | 32%   | 8                               | 29% | 12                             | 34%   | 0.628          |
| HTN                                                        | 25                   | 40%   | 9                               | 32% | 16                             | 46%   | 0.274          |
| COPD                                                       | 13                   | 21%   | 7                               | 25% | 6                              | 17%   | 0.444          |
| CAD/HF                                                     | 7                    | 11%   | 4                               | 14% | 3                              | 9%    | 0.473          |
| CKD                                                        | 4                    | 6%    | 1                               | 4%  | 3                              | 9%    | 0.419          |
| <b>Reason for ICU admission</b>                            |                      |       |                                 |     |                                |       |                |
| Pneumonia                                                  | 55                   | 87%   | 27                              | 96% | 28                             | 80%   | 0.145          |
| Shock                                                      | 9                    | 14%   | 3                               | 11% | 6                              | 17%   | 0.469          |
| Cardiac-related                                            | 3                    | 5%    | 2                               | 7%  | 1                              | 3%    | 0.427          |
| Neurological deficit                                       | 3                    | 5%    | 0                               | 0%  | 3                              | 9%    | 0.112          |
| Operation                                                  | 2                    | 3%    | 1                               | 4%  | 1                              | 3%    | 0.767          |
| <b>Type of EGFR mutation</b>                               |                      |       |                                 |     |                                |       |                |

|                        |    |     |    |     |    |     |       |
|------------------------|----|-----|----|-----|----|-----|-------|
| L858R                  |    |     |    |     | 15 | 43% |       |
| Deletion 19            |    |     |    |     | 14 | 40% |       |
| Uncommon               |    |     |    |     | 6  | 17% |       |
| <b>Metastatic site</b> |    |     |    |     |    |     |       |
| Lung-to-lung           | 39 | 62% | 19 | 68% | 20 | 57% | 0.384 |
| Pleura                 | 41 | 65% | 16 | 57% | 25 | 71% | 0.237 |
| Pericardial effusion   | 7  | 11% | 3  | 11% | 4  | 11% | 0.929 |
| Bone                   | 32 | 51% | 15 | 54% | 17 | 49% | 0.693 |
| Brain                  | 12 | 19% | 4  | 14% | 8  | 23% | 0.389 |
| Liver                  | 12 | 19% | 4  | 14% | 8  | 23% | 0.389 |

Acronyms: APACHE II= Acute Physiologic Assessment and Chronic Health Evaluation (APACHE) II Scoring System, DM= diabetes mellitus, HTN= hypertension, COPD= chronic obstructive pulmonary disease, CAD/HF= coronary artery disease or heart failure, CKD= chronic kidney disease

### Clinical Outcomes of all TKI-treated patients in ICU

Most of the patients were treated with a first- or second-generation EGFR-TKI (gefitinib: 39, erlotinib: 22, and afatinib: 1). Only 1 patient received osimertinib treatment in the ICU. The median duration for the use of EGFR-TKIs in the ICU was 17 vs 8 days ( $p = 0.001$ ) for patients with and without a sensitizing EGFR mutation. The 28-day ICU survival rate in patients with and without mutant EGFR was 77% and 50% ( $p = 0.025$ ), respectively, with significant difference revealed by log rank test ( $p = 0.015$ ). The median survival time for the whole cohort, EGFR-mutant, and EGFR wild-type patients was 52, 67, and 28 days, respectively. The Kaplan-Meier plotting of 28-day, 90-day, and overall survival is shown in Figures 2A, 2B and 2C. The log rank test showed significantly better 28-day, 90-day and overall survival with a  $p$  value of 0.015, 0.010, and 0.001, respectively. In addition, 35% of the patients were successfully weaned from MV. The successful weaning rate was higher among EGFR-mutant cases, (EGFR-mutant versus wild-type: 43% versus 25%,  $p = 0.14$ ); however, the Kaplan-Meier method did not show a significant difference in ventilator-free survival, with a log-rank  $p$  value of 0.949 (Figure 2D). The clinical outcomes were summarized in Table S2.

**Table S2.** Treatment outcomes relevant to EGFR-TKIs.

|                                                    | All ( <i>n</i> = 63) |     | Wild-type<br>( <i>n</i> = 28) |     | EGFR +<br>( <i>n</i> = 35) |     | <i>p</i> value |
|----------------------------------------------------|----------------------|-----|-------------------------------|-----|----------------------------|-----|----------------|
| EGFR-TKI                                           |                      |     |                               |     |                            |     |                |
| Gefitinib                                          | 39                   | 62% | 17                            | 61% | 22                         | 63% | 0.001          |
| Erlotinib                                          | 22                   | 35% | 11                            | 39% | 11                         | 31% |                |
| Afatinib                                           | 1                    | 2%  | 0                             | 0%  | 1                          | 3%  |                |
| Osimertinib                                        | 1                    | 1%  | 0                             |     | 1                          | 3%  |                |
| EGFR-TKI treatment duration                        |                      |     |                               |     |                            |     |                |
| Before ICU (days)                                  | 0 (-6–129)           |     | -4 (-8–12)                    |     | 52 (-4–487)                |     | 0.005          |
| During ICU (days)                                  | 11 (7–21)            |     | 8 (4–11)                      |     | 17 (10–27)                 |     | 0.001          |
| TKI adverse events                                 |                      |     |                               |     |                            |     |                |
| Interstitial pneumonitis ( <i>n</i> , %)           | 5                    | 8%  | 3                             | 11% | 2                          | 6%  | 0.338          |
| Diarrhea ( <i>n</i> , %)                           | 4                    | 6%  | 2                             | 7%  | 2                          | 6%  | 0.974          |
| Hepatitis ( <i>n</i> , %)                          | 1                    | 2%  | 0                             | 0%  | 1                          | 3%  | 0.367          |
| Skin toxicity ( <i>n</i> , %)                      | 4                    | 6%  | 0                             | 0%  | 4                          | 11% | 0.181          |
| Outcome                                            |                      |     |                               |     |                            |     |                |
| ICU 28-day-survival rate                           | 41                   | 65% | 14                            | 50% | 27                         | 77% | 0.025          |
| Overall survival (days)                            | 52 (20–151)          |     | 28 (15–72)                    |     | 67 (31–320)                |     | 0.005          |
| Successful weaning from ventilator ( <i>n</i> , %) | 22                   | 35% | 7                             | 25% | 15                         | 43% | 0.140          |

Acronyms: EGFR = epidermal growth factor receptor, ICU = intensive care unit, TKI = tyrosine kinase inhibitor

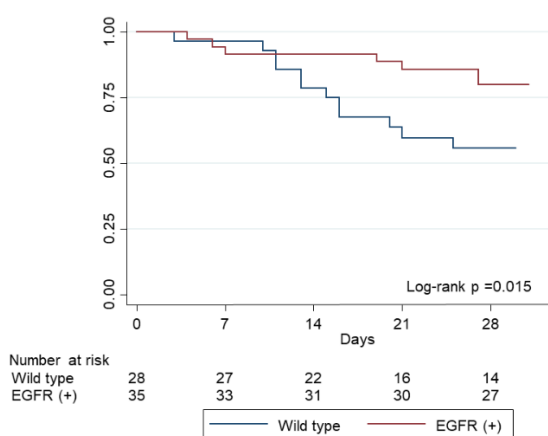

(A)

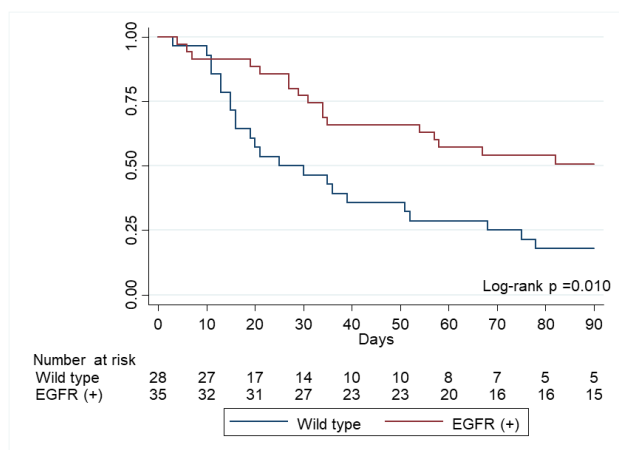

(B)

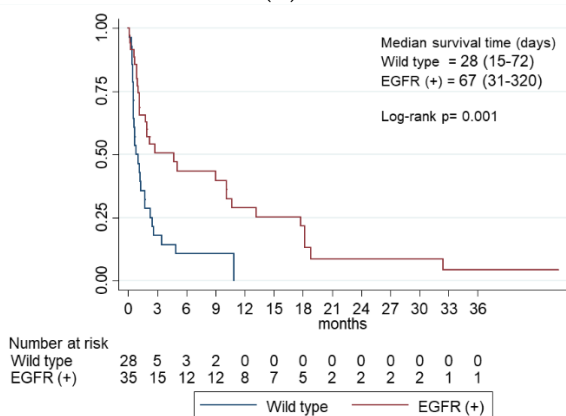

(C)

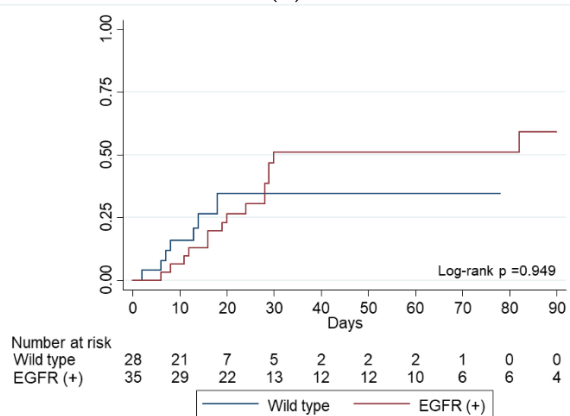

(D)

**Figure S1.** Survival and rate of successful weaning from mechanical ventilation of lung cancer patients receiving EGFR-TKIs in the ICU. (A) 28-day ICU survival. (B) 90-day survival. (C) Overall survival. (D) Cumulative incidence of patients with successful weaning from mechanical ventilators. Acronyms: EGFR = epidermal growth factor receptor, ICU= intensive care unit, TKI= tyrosine kinase inhibitor.
